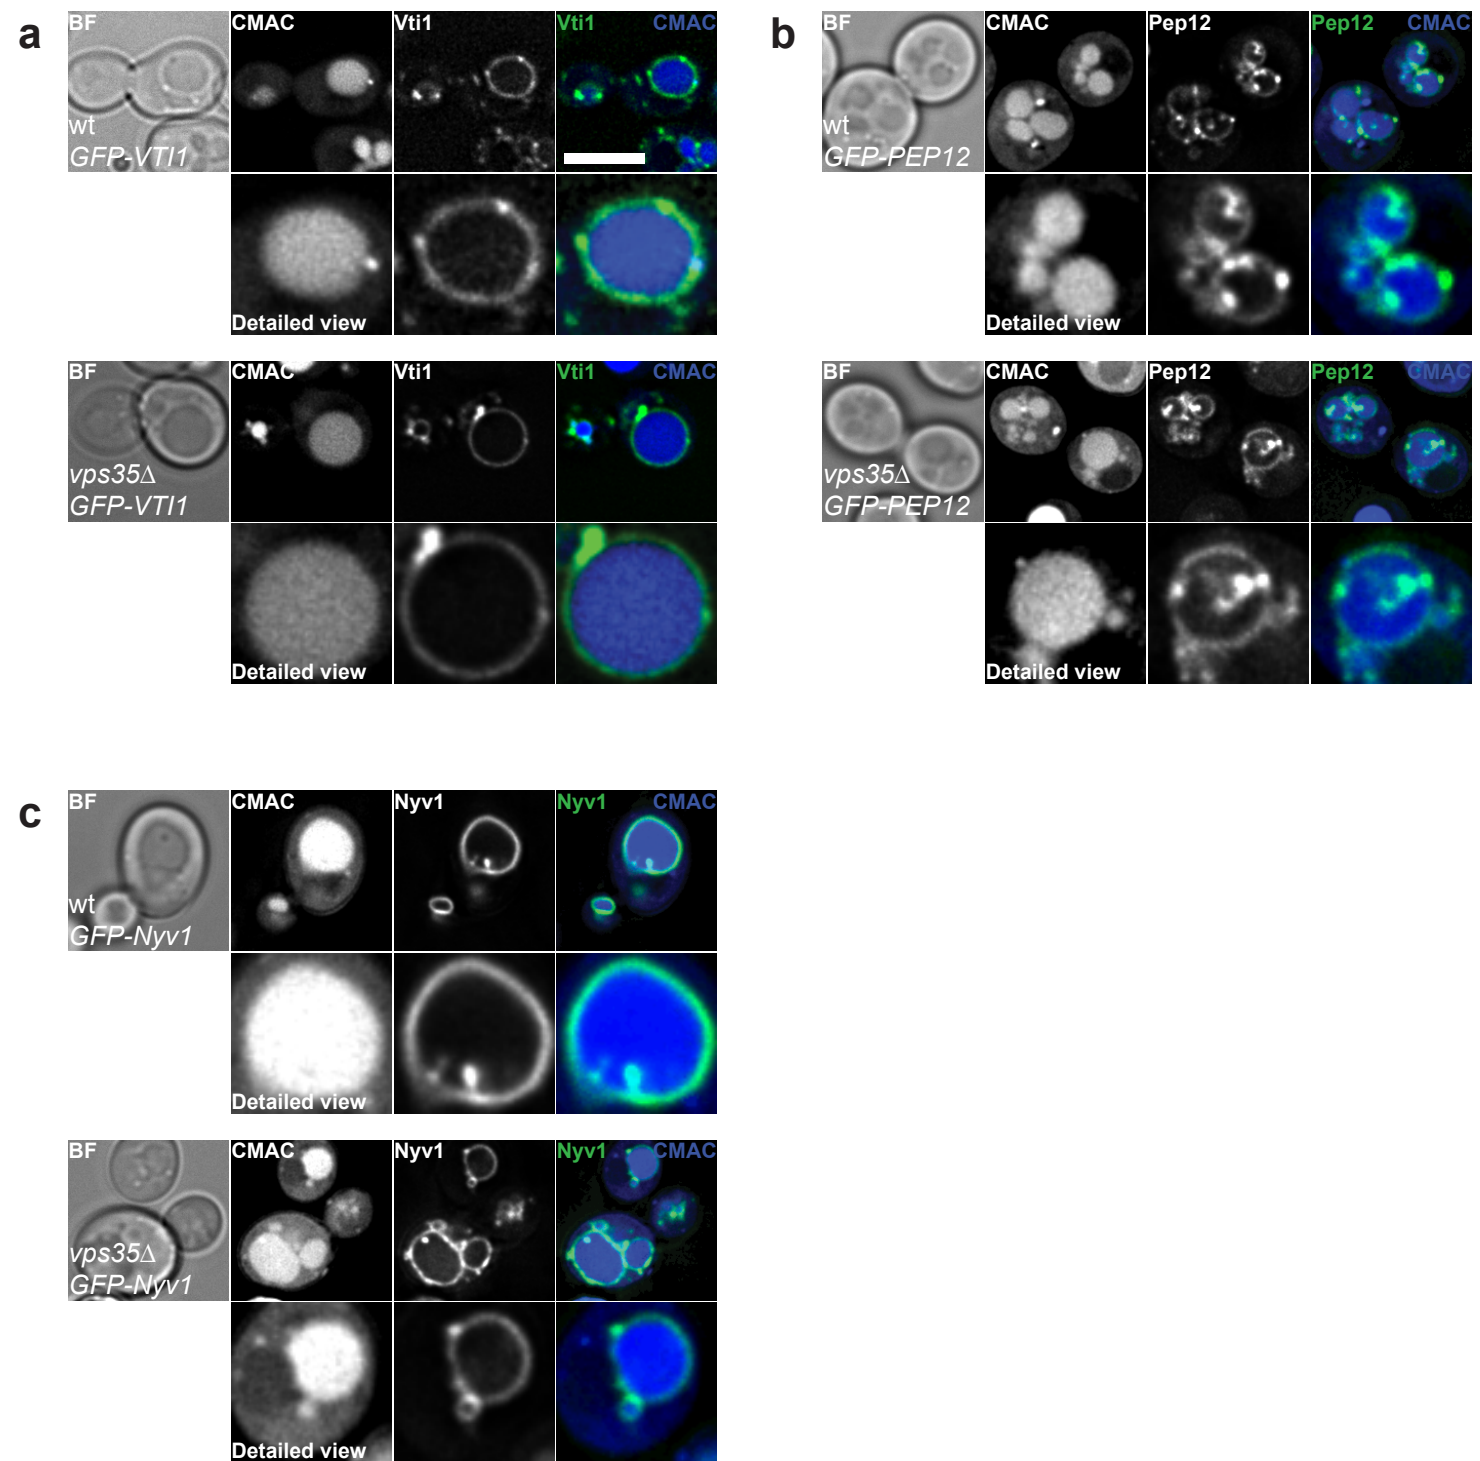

**Figure S1. Localization of vacuolar SNAREs in retromer mutants.** (a-c) Localization of GFP-tagged SNARE proteins was investigated in wild-type and *vps35Δ* cells. (a) Chromosomal *VT11* was N-terminally tagged with GFP under control of the intermediate *PHO5* promoter. (b,c) *GFP-PEP12* and *GFP-NYV1* under control of the *TPII* promoter were expressed from a centromeric plasmids pCU2701 (Pep12) and pCU2702 (Nyv1). Size bar, 5  $\mu$ m.

**Table S1. *Saccharomyces cerevisiae* strains used in this study.**

| Strain  | Genotype                                                                                | Reference                       |
|---------|-----------------------------------------------------------------------------------------|---------------------------------|
| BY4741  | MATa <i>his3Δ1 leu2Δ0 met15Δ0 ura3Δ0</i>                                                | EUROSCARF library               |
| BY4727  | MATalpha <i>his3Δ200 leu2Δ0 lys2Δ0 met15Δ0 trp1Δ63 ura3Δ0</i>                           | EUROSCARF library               |
| BJ3505  | MATa <i>pep4Δ::HIS3 prb1-Δ1.6R lys2-208 trp1Δ101 ura3-52 gal2</i>                       | Haas <i>et al.</i> , 1995       |
| DKY6281 | MATalpha <i>leu2-3 leu2-112 ura3-52 his3-Δ200 trp1-Δ101 lys2-801 suc2-Δ9 PHO8::TRP1</i> | Haas <i>et al.</i> , 1995       |
| SEY6210 | MATalpha <i>leu2-3,122 ura3-52 his3-Δ200 trp-Δ901 lys2-801 suc2-Δ GAL1</i>              | Robinson <i>et al.</i> , 1988   |
| CUY4411 | BY4727; <i>VPS17::GFP-kanMX4</i>                                                        | Balderhaar <i>et al.</i> , 2010 |
| CUY4412 | BY4727; <i>VPS26::GFP-kanMX4</i>                                                        | Balderhaar <i>et al.</i> , 2010 |
| CUY4571 | BY4727; <i>VPS10::GFP-kanMX6</i>                                                        | Balderhaar <i>et al.</i> , 2010 |
| CUY4573 | BY4741; <i>vps26Δ::kanMX6 VPS10::GFP-HIS3</i>                                           | Markgraf <i>et al.</i> , 2009   |
| CUY6133 | BY4727; <i>VPS35::yeGFP-hphNT1</i>                                                      | This study                      |
| CUY6597 | BJ3505; <i>vps35Δ::hphNT1</i>                                                           | This study                      |
| CUY6599 | BJ3505; <i>vps17Δ::hphNT1</i>                                                           | This study                      |
| CUY7569 | BJ3505; <i>vps26Δ::kanMX6</i>                                                           | This study                      |
| CUY7573 | BJ3505; <i>vps17Δ::hphNT1 vps5Δ::kanMX6</i>                                             | This study                      |
| CUY7575 | BJ3505; <i>vps5Δ::kanMX6</i>                                                            | This study                      |
| CUY7837 | BY4727; <i>VPS29::GFP-TRP1</i>                                                          | This study                      |
| CUY7848 | SEY6210; <i>VPS26::3xmCherry-hphNT1</i>                                                 | This study                      |
| CUY9003 | BY4741; <i>VPS10::natNT1-GAL1pr VPS10::GFP-HIS3 vps26Δ::kanMX6</i>                      | This study                      |
| CUY9004 | BY4727; <i>VPS10::natNT1-GAL1pr VPS10::GFP-kanMX6</i>                                   | This study                      |
| CUY9062 | BY4727; <i>VPS10::natNT1-GAL1pr VPS10::GFP-kanMX6 vac8Δ::hphNT1</i>                     | This study                      |
| CUY9063 | BY4727; <i>VPS10::natNT1-GAL1pr VPS10::GFP-kanMX6 vps5Δ::hphNT1</i>                     | This study                      |
| CUY9064 | BY4727; <i>VPS10::natNT1-GAL1pr VPS10::GFP-kanMX6 VPS35::mCherry-TRP1</i>               | This study                      |
| CUY9065 | BY4727; <i>VPS10::natNT1-GAL1pr VPS10::GFP-kanMX6 ypt7Δ::hphNT1</i>                     | This study                      |
| CUY9204 | BY4727; <i>VPS10::natNT1-GAL1pr VPS10::GFP-kanMX6 YPT7::URA3-PHO5pr-mCherry</i>         | This study                      |
| CUY9209 | BY4741; <i>VMA2::yeGFP-hphNT1</i>                                                       | This study                      |
| CUY9212 | BY4741; <i>VMA2::yeGFP-hphNT1 vps35Δ::kanMX6</i>                                        | This study                      |
| CUY9213 | BY4727; <i>VPS10::GFP-kanMX6 ypt7Δ::hphNT1</i>                                          | This study                      |
| CUY9221 | BY4741; <i>VAM3::URA3-PHO5pr-GFP</i>                                                    | This study                      |
| CUY9223 | BY4727; <i>VPS10::natNT1-GALSpr VPS10::GFP-kanMX6</i>                                   | This study                      |
| CUY9330 | BY4727; <i>VPS10::natNT1-GAL1pr VPS10::GFP-kanMX6 VPS1::mCherry-TRP1</i>                | This study                      |
| CUY9331 | BY4727; <i>VPS10::natNT1-GAL1pr VPS10::GFP-kanMX6 YPT6::URA3-PHO5pr-mCherry</i>         | This study                      |
| CUY9332 | BY4727; <i>VPS10::natNT1-GAL1pr VPS10::GFP-kanMX6 mon1Δ::LEU2</i>                       | This study                      |
| CUY9346 | BY4727; <i>VPS10::natNT1-GAL1pr VPS10::GFP-kanMX6 vps1Δ::hphNT1</i>                     | This study                      |
| CUY9347 | BJ3505; <i>vps1Δ::hphNT1</i>                                                            | This study                      |
| CUY9348 | BY4727; <i>VPS10::GFP-kanMX6 ypt7Δ::hphNT1 vps26Δ::TRP1</i>                             | This study                      |
| CUY9399 | BY4727; <i>VPS10::natNT1-GAL1pr VPS10::GFP-kanMX6 VPS8-3xmCherry-hphNT1</i>             | This study                      |
| CUY9400 | BY4727; <i>VPS10::natNT1-GAL1pr VPS10::GFP-kanMX6 apl5Δ::hphNT1</i>                     | This study                      |
| CUY9411 | BY4727; <i>VPS10::natNT1-GAL1pr VPS10::GFP-kanMX6 myp1Δ::TRP1</i>                       | This study                      |
| CUY9417 | BY4727; <i>VPS26::GFP-kanMX4 vps1Δ::natNT1</i>                                          | This study                      |
| CUY9418 | BY4727; <i>VPS35::yeGFP-hphNT1 vps1Δ::natNT1</i>                                        | This study                      |

|         |                                                                            |            |
|---------|----------------------------------------------------------------------------|------------|
| CUY9498 | BY4727; <i>VPS10::natNT1-GAL1pr VPS10::GFP-kanMX6 vac7Δ::TRP1</i>          | This study |
| CUY9499 | BY4727; <i>VPS10::natNT1-GAL1pr VPS10::GFP-kanMX6 erv14Δ::TRP1</i>         | This study |
| CUY9500 | BY4727; <i>VPS10::natNT1-GAL1pr VPS10::GFP-kanMX6 btn2Δ::TRP1</i>          | This study |
| CUY9501 | BY4727; <i>VPS10::natNT1-GAL1pr VPS10::GFP-kanMX6 btn1Δ::TRP1</i>          | This study |
| CUY9502 | BY4727; <i>VPS10::natNT1-GAL1pr VPS10::GFP-kanMX6 btn3Δ::TRP1</i>          | This study |
| CUY9511 | BY4727; <i>VPS10::natNT1-GAL1pr VPS10::GFP-kanMX6 SEC7::mCherry-hphNT1</i> | This study |
| CUY9563 | BY4727; <i>VPS10::natNT1-GAL1pr VPS10::GFP-kanMX6 VPS17::mCherry-TRP1</i>  | This study |
| CUY9569 | BY4727; <i>VPS10::natNT1-GAL1pr VPS10::GFP-kanMX6 vps29Δ::hphNT1</i>       | This study |
| CUY9570 | BY4727; <i>VPS10::natNT1-GAL1pr VPS10::GFP-kanMX6 vps35Δ::TRP1</i>         | This study |
| CUY9576 | BY4727; <i>VPS10::natNT1-GAL1pr VPS10::GFP-kanMX6 msb3Δ::TRP1</i>          | This study |
| CUY9577 | BY4727; <i>VPS10::natNT1-GAL1pr VPS10::GFP-kanMX6 gyp7Δ::TRP1</i>          | This study |
| CUY9581 | BY4727; <i>VPS10::natNT1-GAL1pr VPS10::GFP-kanMX6 msb4Δ::TRP1</i>          | This study |
| CUY9623 | BY4727; <i>VPS17::GFP-kanMX4 vps1Δ::TRP1</i>                               | This study |
| CUY9624 | BY4741; <i>VAM3::URA3-PHO5pr-GFP vps1Δ::hphNT1</i>                         | This study |
| CUY9705 | BY4727; <i>VPS10::GFP-kanMX6 mvp1Δ::TRP1</i>                               | This study |
| CUY9708 | BY4727; <i>VPS10ΔC(1-1490aa)::GFP-TRP1</i>                                 | This study |
| CUY9709 | BY4727; <i>VPS10::natNT1-GAL1pr VPS10ΔC(1-1490aa)::GFP-TRP1</i>            | This study |

---
